# Supplementary material
Source: HighWire-hosted journal article supplement (https://www.ghspjournal.org/highwire/filestream/6740/field_highwire_adjunct_files/0/GHSP-D-22-00017-supplement.pdf)
Supplement: GHSP-D-22-00017-supplement.pdf [file GHSP-D-22-00017-supplement.pdf]

**Supplement Table S1:** Search strategies developed for the literature review on comprehensive vaccine-preventable disease surveillance, by database and search date

| Database                          | Strategy                                                                                                                                                                                                                                                                                                                                                                                                                                                                                                                                                                                                                                                                              | Records                                                      | Records                                                    | Records                                                    |
|-----------------------------------|---------------------------------------------------------------------------------------------------------------------------------------------------------------------------------------------------------------------------------------------------------------------------------------------------------------------------------------------------------------------------------------------------------------------------------------------------------------------------------------------------------------------------------------------------------------------------------------------------------------------------------------------------------------------------------------|--------------------------------------------------------------|------------------------------------------------------------|------------------------------------------------------------|
|                                   |                                                                                                                                                                                                                                                                                                                                                                                                                                                                                                                                                                                                                                                                                       | 11/25/2019                                                   | 12/17/2020                                                 | 10/28/2021                                                 |
| <b>Medline (OVID) 1946-</b>       | (Vaccine preventable ADJ2 disease*) OR<br>(Vaccine preventable ADJ2 infection*) OR<br>(Vaccine preventable ADJ2 illness*) OR<br>VPD* OR cholera OR rubella OR diphtheria<br>OR influenzae OR hepatitis OR human<br>papillomavirus OR influenza OR encephalitis<br>OR measles OR meningococc* OR mumps<br>OR tetanus OR pertussis OR pneumococc*<br>OR polio* OR rotavirus OR rubella OR<br>typhoid OR varicella OR yellow fever<br><br>AND<br><br>(surveillance ADJ5 (integrat* OR expand*<br>OR expansion OR comprehensive OR link*<br>OR adapt* OR joint OR combine* OR<br>platform))<br><br>Limit to 2000 - ; (201911* OR 201912* OR<br>2020* OR 2021*).dt (202012* OR 2021*).dt   | 735                                                          | 78                                                         | 73                                                         |
| <b>Embase (OVID) 1996-</b>        | (Vaccine preventable ADJ2 disease*) OR<br>(Vaccine preventable ADJ2 infection*) OR<br>(Vaccine preventable ADJ2 illness*) OR<br>VPD* OR cholera OR rubella OR diphtheria<br>OR influenzae OR hepatitis OR human<br>papillomavirus OR influenza OR encephalitis<br>OR measles OR meningococc* OR mumps<br>OR tetanus OR pertussis OR pneumococc*<br>OR polio* OR rotavirus OR rubella OR<br>typhoid OR varicella OR yellow fever<br><br>AND<br><br>(surveillance ADJ5 (integrat* OR expand*<br>OR expansion OR comprehensive OR link*<br>OR adapt* OR joint OR combine* OR<br>platform))<br><br>Limit to 2000 - ; NOT pubmed/medline ;<br>(201911* OR 201912* OR 2020* OR<br>2021*).dc | 798<br><br>-484<br>duplicates<br><br>=314<br>unique<br>items | 138<br><br>-79<br>duplicates<br><br>=59<br>unique<br>items | 118<br><br>-54<br>duplicates<br><br>=64<br>unique<br>items |
| <b>Global Health (OVID) 1973-</b> | (Vaccine preventable ADJ2 disease*) OR<br>(Vaccine preventable ADJ2 infection*) OR<br>(Vaccine preventable ADJ2 illness*) OR<br>VPD* OR cholera OR rubella OR diphtheria                                                                                                                                                                                                                                                                                                                                                                                                                                                                                                              | 622<br><br>-416<br>duplicates                                | 61<br><br>-43<br>duplicates                                | 53<br><br>-27<br>duplicates                                |

| Database                                           | Strategy                                                                                                                                                                                                                                                                                                                                                                                                                                                                                                                                                                                                     | Records<br>11/25/2019                                                  | Records<br>12/17/2020                                              | Records<br>10/28/2021                                            |
|----------------------------------------------------|--------------------------------------------------------------------------------------------------------------------------------------------------------------------------------------------------------------------------------------------------------------------------------------------------------------------------------------------------------------------------------------------------------------------------------------------------------------------------------------------------------------------------------------------------------------------------------------------------------------|------------------------------------------------------------------------|--------------------------------------------------------------------|------------------------------------------------------------------|
|                                                    | <p>OR influenzae OR hepatitis OR human papillomavirus OR influenza OR encephalitis OR measles OR meningococc* OR mumps OR tetanus OR pertussis OR pneumococc* OR polio* OR rotavirus OR rubella OR typhoid OR varicella OR yellow fever</p> <p>AND</p> <p>(surveillance ADJ5 (integrat* OR expand* OR expansion OR comprehensive OR link* OR adapt* OR joint OR combine* OR platform))</p> <p>Limit to 2000 - ; (201911* OR 201912* OR 2020* OR 2021*).dc</p>                                                                                                                                                | =206<br>unique<br>items                                                | =18<br>unique<br>items                                             | =26<br>unique<br>items                                           |
| <b>CINAHL<br/>(Ebsco)</b>                          | <p>(“Vaccine preventable” N2 disease*) OR (“Vaccine preventable” N2 infection*) OR (Vaccine preventable N2 illness*) OR VPD* OR cholera OR rubella OR diphtheria OR influenzae OR hepatitis OR “human papillomavirus” OR influenza OR encephalitis OR measles OR meningococcus OR mumps OR tetanus OR pertussis OR pneumococc* OR polio* OR rotavirus OR rubella OR typhoid OR varicella OR “yellow fever”</p> <p>AND</p> <p>(surveillance N5 (integrat* OR expand* OR expansion OR comprehensive OR link* OR adapt* OR joint OR combine* OR platform))</p> <p>Limit to 2000 - ; exclude Medline records</p> | <p>25</p> <p>-16<br/>duplicates</p> <p>=9<br/>unique<br/>items</p>     | <p>11</p> <p>-10<br/>duplicates</p> <p>=1<br/>unique<br/>items</p> | <p>8</p> <p>-2<br/>duplicates</p> <p>=6<br/>unique<br/>items</p> |
| <b>Africa<br/>Wide<br/>Information<br/>(Ebsco)</b> | <p>(“Vaccine preventable” N2 disease*) OR (“Vaccine preventable” N2 infection*) OR (Vaccine preventable N2 illness*) OR VPD* OR cholera OR rubella OR diphtheria OR influenzae OR hepatitis OR “human papillomavirus” OR influenza OR encephalitis OR measles OR meningococcus OR mumps OR tetanus OR pertussis OR pneumococc* OR polio* OR rotavirus OR rubella OR typhoid OR varicella OR “yellow fever”</p>                                                                                                                                                                                               | <p>585</p> <p>-351<br/>duplicates</p> <p>=234<br/>unique<br/>items</p> | 0                                                                  | 0                                                                |

| Database                | Strategy                                                                                                                                                                                                                                                                                                                                                                                                                                                                                                                                                                                                                                                                                                                                                                              | Records<br>11/25/2019                                                  | Records<br>12/17/2020                                                 | Records<br>10/28/2021                                                 |
|-------------------------|---------------------------------------------------------------------------------------------------------------------------------------------------------------------------------------------------------------------------------------------------------------------------------------------------------------------------------------------------------------------------------------------------------------------------------------------------------------------------------------------------------------------------------------------------------------------------------------------------------------------------------------------------------------------------------------------------------------------------------------------------------------------------------------|------------------------------------------------------------------------|-----------------------------------------------------------------------|-----------------------------------------------------------------------|
|                         | <p>AND</p> <p>(surveillance N5 (integrat* OR expand* OR expansion OR comprehensive OR link* OR adapt* OR joint OR combine* OR platform))</p> <p>Limit to 2000 - ;</p>                                                                                                                                                                                                                                                                                                                                                                                                                                                                                                                                                                                                                 |                                                                        |                                                                       |                                                                       |
| <b>Scopus</b>           | <p>TITLE-ABS-KEY(("Vaccine preventable" W/2 disease*) OR ("Vaccine preventable" W/2 infection*) OR (Vaccine preventable W/2 illness*) OR VPD* OR cholera OR rubella OR diphtheria OR influenzae OR hepatitis OR "human papillomavirus" OR influenza OR encephalitis OR measles OR meningococcus OR mumps OR tetanus OR pertussis OR pneumococc* OR polio* OR rotavirus OR rubella OR typhoid OR varicella OR "yellow fever") AND TITLE-ABS-KEY((surveillance W/5 integrat*) OR (surveillance W/5 expand*) OR (surveillance W/5 expansion) OR (surveillance W/5 comprehensive) OR (surveillance W/5 link*) OR (surveillance W/5 adapt*) OR (surveillance W/5 joint) OR (surveillance W/5 combine*) OR (surveillance W/5 platform)) AND NOT INDEX(medline)</p> <p>Limit to 2000 - ;</p> | <p>180</p> <p>-124<br/>duplicates</p> <p>=56<br/>unique<br/>items</p>  | <p>13</p> <p>-7<br/>duplicates</p> <p>=6<br/>unique<br/>items</p>     | <p>22</p> <p>-14<br/>duplicates</p> <p>=8<br/>unique<br/>items</p>    |
| <b>ProQuest Central</b> | <p>((integrat* NEAR/5 surveillance) OR (surveillance NEAR/5 expand*) OR (surveillance NEAR/5 expansion) OR (surveillance NEAR/5 comprehensive) OR (surveillance NEAR/5 link*) OR (surveillance NEAR/5 adapt*) OR (surveillance NEAR/5 joint) OR (surveillance NEAR/5 combine*) OR (surveillance NEAR/5 platform)) AND "vaccine preventable")</p> <p>Abstract Available; Limit 2000 -</p>                                                                                                                                                                                                                                                                                                                                                                                              | <p>587</p> <p>-117<br/>duplicates</p> <p>=470<br/>unique<br/>items</p> | <p>191</p> <p>-48<br/>duplicates</p> <p>=143<br/>unique<br/>items</p> | <p>173</p> <p>-36<br/>duplicates</p> <p>=137<br/>unique<br/>items</p> |

| <b>Database</b>                               | <b>Strategy</b>                                                                                                                                                                                                                                                                                                                                                                                                                                                                      | <b>Records<br/>11/22/2019</b>                               | <b>Records<br/>12/17/2020</b>                            | <b>Records<br/>10/28/2021</b>                             |
|-----------------------------------------------|--------------------------------------------------------------------------------------------------------------------------------------------------------------------------------------------------------------------------------------------------------------------------------------------------------------------------------------------------------------------------------------------------------------------------------------------------------------------------------------|-------------------------------------------------------------|----------------------------------------------------------|-----------------------------------------------------------|
| <b>Medline<br/>(OVID)<br/>1946-</b>           | (syndromic surveillance OR disease surveillance OR (outbreak ADJ5 surveillance) OR (early warning ADJ5 surveillance) OR (global health security ADJ5 surveillance) OR (epidemic ADJ5 surveillance) OR (public health ADJ5 surveillance) OR (IDSR ADJ5 surveillance) OR (EWAR* ADJ5 surveillance) OR (GHS* ADJ5 surveillance)).ti OR (integrated disease surveillance and response).ti,ab.<br><br>AND<br><br>Review.pt<br><br>Limit 2000- ; (201911* OR 201912* OR 2020* OR 2021*).dt | 186                                                         | 12                                                       | 16                                                        |
| <b>Embase<br/>(OVID)<br/>1947-</b>            | (syndromic surveillance OR disease surveillance OR (outbreak ADJ5 surveillance) OR (early warning ADJ5 surveillance) OR (global health security ADJ5 surveillance) OR (epidemic ADJ5 surveillance) OR (public health ADJ5 surveillance) OR (IDSR ADJ5 surveillance) OR (EWAR* ADJ5 surveillance) OR (GHS* ADJ5 surveillance)).ti OR (integrated disease surveillance and response).ti,ab.<br><br>AND<br><br>Review.pt<br><br>Limit 2000-; (201911* OR 201912* OR 2020* OR 2021*).dc  | 205<br><br>-118<br>duplicates<br><br>=87<br>unique<br>items | 27<br><br>-7<br>duplicates<br><br>=20<br>unique<br>items | 29<br><br>-14<br>duplicates<br><br>=15<br>unique<br>items |
| <b>Global<br/>Health<br/>(OVID)<br/>1973-</b> | (syndromic surveillance OR disease surveillance OR (outbreak ADJ5 surveillance) OR (early warning ADJ5 surveillance) OR (global health security ADJ5 surveillance) OR (epidemic ADJ5 surveillance) OR (public health ADJ5 surveillance) OR (IDSR ADJ5 surveillance) OR (EWAR* ADJ5 surveillance) OR (GHS* ADJ5 surveillance)).ti OR (integrated disease surveillance and response).ti,ab.<br><br>AND<br><br>Review.ti                                                                | 40<br><br>-25<br>duplicates<br><br>=15<br>unique<br>items   | 4<br><br>-2<br>duplicates<br><br>=2<br>unique<br>items   | 9<br><br>-2<br>duplicates<br><br>= 7<br>unique<br>items   |

**Supplement to:** Donadel M, Scobie HM, Pastore R, et al. Comprehensive vaccine-preventable disease surveillance in the Western Pacific Region: a literature review on integration of surveillance functions, 2000–2021. *Glob Health Sci Pract.* 2022;10(5):e2200017. <https://doi.org/10.9745/GHSP-D-22-00017>

| Database                       | Strategy                                                                                                                                                                                                                                                                                                                                                                                                                                                                                                                                                                                                                                                                                                                                                                      | Records<br>11/22/2019                                    | Records<br>12/17/2020                                    | Records<br>10/28/2021                                   |
|--------------------------------|-------------------------------------------------------------------------------------------------------------------------------------------------------------------------------------------------------------------------------------------------------------------------------------------------------------------------------------------------------------------------------------------------------------------------------------------------------------------------------------------------------------------------------------------------------------------------------------------------------------------------------------------------------------------------------------------------------------------------------------------------------------------------------|----------------------------------------------------------|----------------------------------------------------------|---------------------------------------------------------|
|                                | Limit 2000-; (201911* OR 201912* OR 2020* OR 2021*).up                                                                                                                                                                                                                                                                                                                                                                                                                                                                                                                                                                                                                                                                                                                        |                                                          |                                                          |                                                         |
| <b>CINAHL (Ebsco)</b>          | (TI (“syndromic surveillance” OR “disease surveillance” OR (outbreak N5 surveillance) OR (“early warning” N5 surveillance) OR (“global health security” N5 surveillance) OR (epidemic N5 surveillance) OR (“public health” N5 surveillance)) OR (“integrated disease surveillance and response”)) OR (AB (“syndromic surveillance” OR “disease surveillance” OR (outbreak N5 surveillance) OR (“early warning” N5 surveillance) OR (“global health security” N5 surveillance) OR (epidemic N5 surveillance) OR (“public health” N5 surveillance) OR (IDSR N5 surveillance) OR (EWAR* N5 surveillance) OR (GHS* N5 surveillance)) OR (“integrated disease surveillance and response”))<br><br><b>Limiters</b> - Exclude MEDLINE records; Publication Type: Review; Limit 2000- | 19<br><br>-1<br>duplicates<br><br>=18<br>unique<br>items | 27<br><br>-5<br>duplicates<br><br>=22<br>unique<br>items | 8<br><br>-0<br>duplicates<br><br>= 8<br>unique<br>items |
| <b>Africa Wide Information</b> | (TI (“syndromic surveillance” OR “disease surveillance” OR (outbreak N5 surveillance) OR (“early warning” N5 surveillance) OR (“global health security” N5 surveillance) OR (epidemic N5 surveillance) OR (“public health” N5 surveillance)) OR (“integrated disease surveillance and response”)) OR (AB (“syndromic surveillance” OR “disease surveillance” OR (outbreak N5 surveillance) OR (“early warning” N5 surveillance) OR (“global health security” N5 surveillance) OR (epidemic N5 surveillance) OR (“public health” N5 surveillance) OR (IDSR N5 surveillance) OR (EWAR* N5 surveillance) OR (GHS* N5 surveillance)) OR (“integrated disease surveillance and response”))<br><br><b>Limiters</b> - Scholarly (Peer Reviewed) Journals ; Limit 2000-               | 0                                                        | 0                                                        | 0                                                       |
| <b>Scopus</b>                  | (TITLE(“syndromic surveillance” OR “disease surveillance” OR (outbreak W/5 surveillance) OR (“early warning” W/5 surveillance) OR (“global health security” W/5 surveillance) OR (epidemic W/5 surveillance) OR (“public health” W/5 surveillance) OR (IDSR W/5 surveillance) OR                                                                                                                                                                                                                                                                                                                                                                                                                                                                                              | 42<br><br>-7<br>duplicates<br><br>=35                    | 6<br><br>-3<br>duplicates<br><br>=3                      | 50<br><br>-2<br>duplicates<br><br>=48                   |

**Supplement to:** Donadel M, Scobie HM, Pastore R, et al. Comprehensive vaccine-preventable disease surveillance in the Western Pacific Region: a literature review on integration of surveillance functions, 2000–2021. *Glob Health Sci Pract.* 2022;10(5):e2200017. <https://doi.org/10.9745/GHSP-D-22-00017>

| <b>Database</b> | <b>Strategy</b>                                                                                                                                                                  | <b>Records</b><br>11/22/2019 | <b>Records</b><br>12/17/2020 | <b>Records</b><br>10/28/2021 |
|-----------------|----------------------------------------------------------------------------------------------------------------------------------------------------------------------------------|------------------------------|------------------------------|------------------------------|
|                 | (EWAR* W/5 surveillance) OR (GHS* W/5 surveillance) OR TITLE-ABS(“integrated disease surveillance and response”) AND NOT INDEX(medline) AND NOT INDEX(embase)<br><br>Limit 2000- | unique items                 | unique items                 | unique items                 |

**Supplement to:** Donadel M, Scobie HM, Pastore R, et al. Comprehensive vaccine-preventable disease surveillance in the Western Pacific Region: a literature review on integration of surveillance functions, 2000–2021. *Glob Health Sci Pract.* 2022;10(5):e2200017. <https://doi.org/10.9745/GHSP-D-22-00017>

**Supplement Table S2:** Countries referenced in the articles included (n=87) - literature review on comprehensive vaccine-preventable disease surveillance in the WHO Western Pacific Region, 2010-2021

| <b>Country</b>                 | <b>Number of articles in which the country is referenced</b> |
|--------------------------------|--------------------------------------------------------------|
| China                          | 16                                                           |
| Vietnam                        | 14                                                           |
| Cambodia                       | 13                                                           |
| Lao PDR                        | 13                                                           |
| Philippines                    | 12                                                           |
| Fiji                           | 9                                                            |
| Mongolia                       | 9                                                            |
| Papua New Guinea               | 9                                                            |
| Australia                      | 6                                                            |
| Japan                          | 6                                                            |
| Malaysia                       | 6                                                            |
| Chinese Taipei                 | 5                                                            |
| Singapore                      | 5                                                            |
| New Zealand                    | 4                                                            |
| Republic of Korea              | 4                                                            |
| Solomon Islands                | 4                                                            |
| Hong Kong                      | 3                                                            |
| Samoa                          | 3                                                            |
| Tuvalu                         | 3                                                            |
| Vanuatu                        | 3                                                            |
| Brunei Darussalam              | 2                                                            |
| Federated States of Micronesia | 2                                                            |
| French Polynesia               | 2                                                            |
| Macao                          | 2                                                            |
| Marshall Islands               | 2                                                            |
| Nauru                          | 2                                                            |
| New Caledonia                  | 2                                                            |
| Northern Mariana Islands       | 2                                                            |
| Palau                          | 2                                                            |
| Tonga                          | 2                                                            |
| Wallis and Futuna              | 2                                                            |
| American Samoa                 | 1                                                            |
| Cook Islands                   | 1                                                            |
| Guam                           | 1                                                            |
| Kiribati                       | 1                                                            |
| Niue                           | 1                                                            |
| Pitcairn island                | 1                                                            |
| Tokelau                        | 1                                                            |
| Regional*                      | 13                                                           |

**Supplement to:** Donadel M, Scobie HM, Pastore R, et al. Comprehensive vaccine-preventable disease surveillance in the Western Pacific Region: a literature review on integration of surveillance functions, 2000–2021. *Glob Health Sci Pract.* 2022;10(5):e2200017. <https://doi.org/10.9745/GHSP-D-22-00017>

Global\*

11

---

\*Publications with aggregated regional or global data.



**Supplement to:** Donadel M, Scobie HM, Pastore R, et al. Comprehensive vaccine-preventable disease surveillance in the Western Pacific Region: a literature review on integration of surveillance functions, 2000–2021. *Glob Health Sci Pract.* 2022;10(5):e2200017. <https://doi.org/10.9745/GHSP-D-22-00017>

**Supplement Table S3:** Articles included in the review by selected characteristics (n=87) - literature review on comprehensive vaccine-preventable disease surveillance in the WHO Western Pacific Region, 2010-2021

| <b>Title</b>                           | <b>Type of publication</b> | <b>Place</b>                                              | <b>Type(s) of surveillance</b>                     | <b>Surveillance support functions integrated</b>                                                                             | <b>Enabling factors/ effectiveness of integration described</b>                                          |
|----------------------------------------|----------------------------|-----------------------------------------------------------|----------------------------------------------------|------------------------------------------------------------------------------------------------------------------------------|----------------------------------------------------------------------------------------------------------|
| Craig et al. (2018) <sup>11</sup>      | Published                  | Solomon Islands, LMIC                                     | Case-based surveillance, nationwide implementation | Governance, Program management, Workforce capacity, Field logistics and communication, Data management and use, Coordination | <input checked="" type="checkbox"/> Enabling factor<br><input checked="" type="checkbox"/> Effectiveness |
| Davgasuren et al. (2019) <sup>12</sup> | Published                  | Mongolia, LMIC                                            | Case-based surveillance, nationwide implementation | Governance, Workforce capacity, Field logistics and communication, Data management and use, Coordination                     | <input type="checkbox"/> Enabling factor<br><input type="checkbox"/> Effectiveness                       |
| Calain (2007) <sup>13</sup>            | Published                  | Cambodia, Lao PDR, LMICs                                  | Case-based surveillance, nationwide implementation | Workforce capacity                                                                                                           | <input checked="" type="checkbox"/> Enabling factor<br><input type="checkbox"/> Effectiveness            |
| Chretien et al. (2008) <sup>14</sup>   | Published                  | Global, multiple income - levels                          | Case-based surveillance, nationwide implementation | Workforce capacity, Field logistics and communication, Data management and use                                               | <input checked="" type="checkbox"/> Enabling factor<br><input type="checkbox"/> Effectiveness            |
| May et al. (2009) <sup>15</sup>        | Published                  | Chinese Taipei, Vanuatu, Solomon Islands, Samoa, multiple | Case-based surveillance, nationwide implementation | Workforce capacity, Field logistics and communication, Laboratory, Data management and use, Coordination                     | <input type="checkbox"/> Enabling factor<br><input checked="" type="checkbox"/> Effectiveness            |

**Supplement to:** Donadel M, Scobie HM, Pastore R, et al. Comprehensive vaccine-preventable disease surveillance in the Western Pacific Region: a literature review on integration of surveillance functions, 2000–2021. *Glob Health Sci Pract.* 2022;10(5):e2200017. <https://doi.org/10.9745/GHSP-D-22-00017>

|                                                             |           |                                                                  |                                                                 |                                                                                                                 |                                                                                                          |
|-------------------------------------------------------------|-----------|------------------------------------------------------------------|-----------------------------------------------------------------|-----------------------------------------------------------------------------------------------------------------|----------------------------------------------------------------------------------------------------------|
|                                                             |           | income - levels                                                  |                                                                 |                                                                                                                 |                                                                                                          |
| Li et al. (2012) <sup>16</sup>                              | Published | China, UMIC                                                      | Case-based surveillance, nationwide implementation              | Governance, Laboratory, Data management and use                                                                 | <input type="checkbox"/> Enabling factor<br><input checked="" type="checkbox"/> Effectiveness            |
| Clara et al. (2020) <sup>17</sup>                           | Published | Vietnam, LMIC                                                    | Event-based surveillance, implementation in 6 provinces         | Governance, Supervision                                                                                         | <input checked="" type="checkbox"/> Enabling factor<br><input checked="" type="checkbox"/> Effectiveness |
| Craig et al. (2020) <sup>18</sup>                           | Published | Pacific island countries and territories, multiple income levels | Event-based, case-based surveillance, nationwide implementation | Data management and use                                                                                         | <input type="checkbox"/> Enabling factor<br><input type="checkbox"/> Effectiveness                       |
| Jayatilleke et al. (2020) <sup>19</sup>                     | Published | Global, LMIC                                                     | Aggregate surveillance, nationwide implementation               | Data management and use                                                                                         | <input checked="" type="checkbox"/> Enabling factor<br><input type="checkbox"/> Effectiveness            |
| Zurynski et al. (2013) <sup>20</sup>                        | Published | Australia, HIC                                                   | Case-based surveillance, nationwide implementation              | Workforce capacity, Field Logistics and communication, Laboratory, Coordination                                 | <input checked="" type="checkbox"/> Enabling factor<br><input type="checkbox"/> Effectiveness            |
| Touch et al. (2009) <sup>21</sup>                           | Published | Cambodia, LMIC                                                   | Case-based surveillance, nationwide implementation              | Governance, Workforce capacity, Laboratory, Data management and use                                             | <input type="checkbox"/> Enabling factor<br><input checked="" type="checkbox"/> Effectiveness            |
| Cambodia National Immunization Program (2015) <sup>22</sup> | Gray      | Cambodia, LMIC                                                   | Case-based, aggregate surveillance, nationwide implementation   | Program management, Workforce capacity, Field Logistics and communication, Supervision, Data management and use | <input type="checkbox"/> Enabling factor<br><input type="checkbox"/> Effectiveness                       |
| Cambodia National Immunization Program (2017) <sup>23</sup> | Gray      | Cambodia, LMIC                                                   | Case-based, nationwide implementation                           | Governance, Workforce capacity, Field Logistics and communication, Data management and use                      | <input type="checkbox"/> Enabling factor<br><input type="checkbox"/> Effectiveness                       |

**Supplement to:** Donadel M, Scobie HM, Pastore R, et al. Comprehensive vaccine-preventable disease surveillance in the Western Pacific Region: a literature review on integration of surveillance functions, 2000–2021. *Glob Health Sci Pract.* 2022;10(5):e2200017. <https://doi.org/10.9745/GHSP-D-22-00017>

|                                                                                  |           |                |                                                               |                                                                                                                            |                                                                                                          |
|----------------------------------------------------------------------------------|-----------|----------------|---------------------------------------------------------------|----------------------------------------------------------------------------------------------------------------------------|----------------------------------------------------------------------------------------------------------|
| Touch et al. (2009) <sup>24</sup>                                                | Published | Cambodia, LMIC | Case-based, aggregate surveillance, nationwide implementation | Governance, Workforce capacity, Field Logistics and communication, Laboratory                                              | <input checked="" type="checkbox"/> Enabling factor<br><input checked="" type="checkbox"/> Effectiveness |
| Wang et al. (2008) <sup>25</sup>                                                 | Published | China, UMIC    | Case-based, aggregate surveillance, nationwide implementation | Workforce capacity                                                                                                         | <input type="checkbox"/> Enabling factor<br><input type="checkbox"/> Effectiveness                       |
| World Health Organization. (2012) <sup>26</sup>                                  | Published | China, UMIC    | Case-based, aggregate surveillance, nationwide implementation | Governance, Program management, Workforce capacity, Field Logistics and communication, Laboratory, Data management and use | <input checked="" type="checkbox"/> Enabling factor<br><input type="checkbox"/> Effectiveness            |
| Cavallaro et al. (2015) <sup>27</sup>                                            | Published | China, UMIC    | Case-based, aggregate surveillance, nationwide implementation | Governance, Workforce capacity, Field Logistics and communication, Laboratory, Supervision                                 | <input checked="" type="checkbox"/> Enabling factor<br><input checked="" type="checkbox"/> Effectiveness |
| Sandhu (2013) <sup>28</sup>                                                      | Published | China, UMIC    | Case-based, aggregate surveillance, nationwide implementation | Workforce capacity, Field Logistics and communication, Laboratory, Data management and use                                 | <input checked="" type="checkbox"/> Enabling factor<br><input type="checkbox"/> Effectiveness            |
| World Health Organization, Western Pacific Regional Office. (2017) <sup>29</sup> | Gray      | Fiji, UMIC     | Case-based surveillance, single site implementation           | Governance, Workforce capacity, Field Logistics and communication, Laboratory, Data management and use                     | <input checked="" type="checkbox"/> Enabling factor<br><input type="checkbox"/> Effectiveness            |
| Dunne et al. (2016) <sup>30</sup>                                                | Published | Fiji, UMIC     | Case-based surveillance, single site implementation           | Governance, Field Logistics and communication, Laboratory                                                                  | <input checked="" type="checkbox"/> Enabling factor<br><input type="checkbox"/> Effectiveness            |

**Supplement to:** Donadel M, Scobie HM, Pastore R, et al. Comprehensive vaccine-preventable disease surveillance in the Western Pacific Region: a literature review on integration of surveillance functions, 2000–2021. *Glob Health Sci Pract.* 2022;10(5):e2200017. <https://doi.org/10.9745/GHSP-D-22-00017>

|                                                                                  |           |                                                 |                                                                            |                                                                               |                                                                                                          |
|----------------------------------------------------------------------------------|-----------|-------------------------------------------------|----------------------------------------------------------------------------|-------------------------------------------------------------------------------|----------------------------------------------------------------------------------------------------------|
| World Health Organization (2019) <sup>31</sup>                                   | Gray      | Fiji, UMIC                                      | Case-based surveillance, single site implementation                        | Workforce capacity, Field Logistics and communication                         | <input checked="" type="checkbox"/> Enabling factor<br><input type="checkbox"/> Effectiveness            |
| Rota et al. (2011) <sup>32</sup>                                                 | Published | Global, multiple income levels                  | Case-based surveillance, nationwide implementation                         | Laboratory                                                                    | <input checked="" type="checkbox"/> Enabling factor<br><input checked="" type="checkbox"/> Effectiveness |
| World Health Organization, Western Pacific Regional Office (2017) <sup>33</sup>  | Published | Global, multiple income levels                  | Case-based, aggregate, event-based surveillance, nationwide implementation | Governance, Workforce capacity, Data management and use, Coordination         | <input checked="" type="checkbox"/> Enabling factor<br><input type="checkbox"/> Effectiveness            |
| World Health Organization (2000) <sup>34</sup>                                   | Published | Global, multiple income levels                  | Case-based, aggregate surveillance, nationwide implementation              | Governance, Workforce capacity, Field Logistics and communication, Laboratory | <input type="checkbox"/> Enabling factor<br><input type="checkbox"/> Effectiveness                       |
| World Health Organization (2018) <sup>35</sup>                                   | Gray      | Global, multiple income levels                  | Case-based surveillance, sentinel sites                                    | Laboratory                                                                    | <input type="checkbox"/> Enabling factor<br><input type="checkbox"/> Effectiveness                       |
| World Health Organization, Western Pacific Regional Office. (2019) <sup>36</sup> | Gray      | Regional (WPR), multiple income levels          | Case-based surveillance, nationwide implementation                         | Laboratory                                                                    | <input checked="" type="checkbox"/> Enabling factor<br><input type="checkbox"/> Effectiveness            |
| World Health Organization, Western Pacific Regional Office. (2017) <sup>7</sup>  | Gray      | Regional (WPR), multiple income levels          | Case-based, aggregate surveillance, nationwide implementation              | Data management and use                                                       | <input type="checkbox"/> Enabling factor<br><input type="checkbox"/> Effectiveness                       |
| World Health Organization (2014) <sup>37</sup>                                   | Published | Bi-regional (WPR, SEAR), multiple income levels | Case-based surveillance, sentinel sites                                    | Laboratory                                                                    | <input type="checkbox"/> Enabling factor<br><input type="checkbox"/> Effectiveness                       |
| World Health Organization (2019) <sup>38</sup>                                   | Gray      | Global, multiple income levels                  | Case-based surveillance, sentinel sites                                    | Laboratory                                                                    | <input type="checkbox"/> Enabling factor<br><input checked="" type="checkbox"/> Effectiveness            |
| Heffelfinger et al. (2017) <sup>39</sup>                                         | Published | Bi-regional (WPR, SEAR), multiple income levels | Case-based surveillance, sentinel sites                                    | Governance                                                                    | <input type="checkbox"/> Enabling factor<br><input type="checkbox"/> Effectiveness                       |
| Biellik et al. (2018) <sup>40</sup>                                              | Published | Global, multiple income levels                  | Case-based surveillance,                                                   | Governance, Workforce capacity, Data                                          | <input type="checkbox"/> Enabling factor                                                                 |

**Supplement to:** Donadel M, Scobie HM, Pastore R, et al. Comprehensive vaccine-preventable disease surveillance in the Western Pacific Region: a literature review on integration of surveillance functions, 2000–2021. *Glob Health Sci Pract.* 2022;10(5):e2200017. <https://doi.org/10.9745/GHSP-D-22-00017>

|                                                                                                                                                                            |      |               |                                                                            |                                                                                                                                                       |                                                                                     |
|----------------------------------------------------------------------------------------------------------------------------------------------------------------------------|------|---------------|----------------------------------------------------------------------------|-------------------------------------------------------------------------------------------------------------------------------------------------------|-------------------------------------------------------------------------------------|
|                                                                                                                                                                            |      |               | nationwide implementation                                                  | management and use                                                                                                                                    | <input type="checkbox"/> Effectiveness                                              |
| Gavi the Vaccine Alliance (Gavi) (2019) <sup>41</sup>                                                                                                                      | Gray | Lao PDR, LMIC | Case-based surveillance, nationwide implementation                         | Workforce capacity, Data management and use                                                                                                           | <input type="checkbox"/> Enabling factor<br><input type="checkbox"/> Effectiveness  |
| Lao People’s Democratic Republic National Centre for Laboratory and Epidemiology. (2013) <sup>42</sup>                                                                     | Gray | Lao PDR, LMIC | Case-based, aggregate, event-based surveillance, nationwide implementation | Governance, Workforce capacity, Supervision                                                                                                           | <input type="checkbox"/> Enabling factor:<br><input type="checkbox"/> Effectiveness |
| World Health Organization, UNICEF, GAVI Alliance, Luxembourg Agency for Development Cooperation, and U.S. Centers for Disease Control and Prevention. (2012) <sup>43</sup> | Gray | Lao PDR, LMIC | Case-based surveillance, Nationwide implementation                         | Workforce capacity                                                                                                                                    | <input type="checkbox"/> Enabling factor<br><input type="checkbox"/> Effectiveness  |
| Lao People’s Democratic Republic Ministry of Health, World Health Organization, and U.S. Centers for Disease Control and Prevention. (2015) <sup>44</sup>                  | Gray | Lao PDR, LMIC | Case-based, event-based surveillance, nationwide implementation            | Governance, Program management, Workforce capacity, Field Logistics and communication, Laboratory, Supervision, Data management and use, Coordination | <input type="checkbox"/> Enabling factor<br><input type="checkbox"/> Effectiveness  |
| Lao People’s Democratic Republic Ministry of Health, World Health Organization, and U.S. Centers for                                                                       | Gray | Lao PDR, LMIC | Case-based, aggregate, event-based surveillance, Regional implementation   | Governance, Workforce capacity, Field Logistics and communication, Laboratory, Supervision, Coordination                                              | <input type="checkbox"/> Enabling factor<br><input type="checkbox"/> Effectiveness  |

**Supplement to:** Donadel M, Scobie HM, Pastore R, et al. Comprehensive vaccine-preventable disease surveillance in the Western Pacific Region: a literature review on integration of surveillance functions, 2000–2021. *Glob Health Sci Pract.* 2022;10(5):e2200017. <https://doi.org/10.9745/GHSP-D-22-00017>

|                                                                                                                                                        |      |                   |                                                                 |                                                                                                                     |                                                                                                          |
|--------------------------------------------------------------------------------------------------------------------------------------------------------|------|-------------------|-----------------------------------------------------------------|---------------------------------------------------------------------------------------------------------------------|----------------------------------------------------------------------------------------------------------|
| Disease Control and Prevention. (2017) <sup>45</sup>                                                                                                   |      |                   |                                                                 |                                                                                                                     |                                                                                                          |
| World Health Organization, Western Pacific Regional Office. (2019) <sup>46</sup>                                                                       | Gray | Lao PDR, LMIC     | Case-based, aggregate surveillance, nationwide implementation   | Data management and use                                                                                             | <input type="checkbox"/> Enabling factor<br><input type="checkbox"/> Effectiveness                       |
| World Health Organization, Western Pacific Regional Office. (2015) <sup>47</sup>                                                                       | Gray | Mongolia, LMIC    | Case-based surveillance, capital city implementation            | Governance, Workforce capacity, Field Logistics and communication, Laboratory                                       | <input type="checkbox"/> Enabling factor<br><input type="checkbox"/> Effectiveness                       |
| World Health Organization, Western Pacific Regional Office. (2016) <sup>48</sup>                                                                       | Gray | Mongolia, LMIC    | Case-based surveillance, nationwide implementation              | Workforce capacity, Field Logistics and communication, Laboratory                                                   | <input checked="" type="checkbox"/> Enabling factor<br><input type="checkbox"/> Effectiveness            |
| Mongolia Ministry of Health, World Health Organization, UNICEF, and U.S. Centers for Disease Control and Prevention. (2017) <sup>49</sup>              | Gray | Mongolia, LMIC    | Case-based surveillance, nationwide implementation              | Governance                                                                                                          | <input type="checkbox"/> Enabling factor<br><input type="checkbox"/> Effectiveness                       |
| World Health Organization, Western Pacific Regional Office. (2015) <sup>50</sup>                                                                       | Gray | Philippines, LMIC | Case-based surveillance, nationwide implementation              | Field Logistics and communication, Laboratory                                                                       | <input checked="" type="checkbox"/> Enabling factor<br><input type="checkbox"/> Effectiveness            |
| Republic of the Philippines Department of Health, World Health Organization, and U.S. Centers for Disease Control and Prevention. (2016) <sup>51</sup> | Gray | Philippines, LMIC | Case-based, event-based surveillance, nationwide implementation | Governance, Workforce capacity, Field Logistics and communication, Laboratory, Supervision, Data management and use | <input checked="" type="checkbox"/> Enabling factor<br><input checked="" type="checkbox"/> Effectiveness |

**Supplement to:** Donadel M, Scobie HM, Pastore R, et al. Comprehensive vaccine-preventable disease surveillance in the Western Pacific Region: a literature review on integration of surveillance functions, 2000–2021. *Glob Health Sci Pract.* 2022;10(5):e2200017. <https://doi.org/10.9745/GHSP-D-22-00017>

|                                                                                                                                                      |      |                                                |                                                                             |                                                                                                                                          |                                                                                                          |
|------------------------------------------------------------------------------------------------------------------------------------------------------|------|------------------------------------------------|-----------------------------------------------------------------------------|------------------------------------------------------------------------------------------------------------------------------------------|----------------------------------------------------------------------------------------------------------|
| World Health Organization. (2019) <sup>52</sup>                                                                                                      | Gray | Philippines, LMIC                              | Case-based, event-based surveillance, nationwide implementation             | Laboratory                                                                                                                               | <input type="checkbox"/> Enabling factor<br><input type="checkbox"/> Effectiveness                       |
| World Health Organization, Western Pacific Regional Office. (2019) <sup>53</sup>                                                                     | Gray | Philippines, LMIC                              | Case-based, event-based surveillance, nationwide implementation             | Governance                                                                                                                               | <input type="checkbox"/> Enabling factor<br><input type="checkbox"/> Effectiveness                       |
| World Health Organization, Western Pacific Regional Office. (2016) <sup>54</sup>                                                                     | Gray | PNG, LMIC                                      | Case-based surveillance, implementation in major cities (Port Moresby, Lae) | Laboratory                                                                                                                               | <input checked="" type="checkbox"/> Enabling factor<br><input type="checkbox"/> Effectiveness            |
| World Health Organization, Western Pacific Regional Office. (2016) <sup>55</sup>                                                                     | Gray | PNG, LMIC                                      | Case-based, aggregate surveillance, national implementation                 | Governance, Workforce capacity, Laboratory                                                                                               | <input checked="" type="checkbox"/> Enabling factor<br><input type="checkbox"/> Effectiveness            |
| Papua New Guinea National Department of Health, World Health Organization, and U.S. Centers for Disease Control and Prevention. (2017) <sup>56</sup> | Gray | PNG, LMIC                                      | Case-based surveillance, nationwide implementation                          | Governance, Program management                                                                                                           | <input type="checkbox"/> Enabling factor<br><input type="checkbox"/> Effectiveness                       |
| World Health Organization, Western Pacific Regional Office. (2019) <sup>57</sup>                                                                     | Gray | PNG, LMIC                                      | Case-based surveillance, nationwide implementation                          | Governance, Program management, Workforce capacity, Field Logistics and communication, Laboratory, Data management and use, Coordination | <input checked="" type="checkbox"/> Enabling factor<br><input checked="" type="checkbox"/> Effectiveness |
| World Health Organization, Western Pacific Regional Office. (2019) <sup>58</sup>                                                                     | Gray | Western Pacific Region, multiple income levels | Case-based surveillance, nationwide implementation                          | Data management and use                                                                                                                  | <input checked="" type="checkbox"/> Enabling factor<br><input type="checkbox"/> Effectiveness            |

**Supplement to:** Donadel M, Scobie HM, Pastore R, et al. Comprehensive vaccine-preventable disease surveillance in the Western Pacific Region: a literature review on integration of surveillance functions, 2000–2021. *Glob Health Sci Pract.* 2022;10(5):e2200017. <https://doi.org/10.9745/GHSP-D-22-00017>

|                                                                                  |           |                                                |                                                                            |                                                                                                        |                                                                                                          |
|----------------------------------------------------------------------------------|-----------|------------------------------------------------|----------------------------------------------------------------------------|--------------------------------------------------------------------------------------------------------|----------------------------------------------------------------------------------------------------------|
| World Health Organization, Western Pacific Regional Office. (2018) <sup>59</sup> | Gray      | Western Pacific Region, multiple income levels | Case-based surveillance, nationwide implementation                         | Laboratory                                                                                             | <input checked="" type="checkbox"/> Enabling factor<br><input type="checkbox"/> Effectiveness            |
| World Health Organization, Western Pacific Regional Office. (2018) <sup>60</sup> | Gray      | Western Pacific Region, multiple income levels | Case-based surveillance, nationwide implementation                         | Governance, Laboratory, Supervision, Data management and use                                           | <input checked="" type="checkbox"/> Enabling factor<br><input type="checkbox"/> Effectiveness            |
| World Health Organization, Western Pacific Regional Office. (2013) <sup>61</sup> | Published | Western Pacific Region, multiple income levels | Case-based surveillance, nationwide implementation                         | Governance, Workforce capacity, Field Logistics and communication, Laboratory, Data management and use | <input type="checkbox"/> Enabling factor<br><input type="checkbox"/> Effectiveness                       |
| World Health Organization, Western Pacific Regional Office. (2020) <sup>62</sup> | Gray      | Western Pacific Region, multiple income levels | Case-based, aggregate, event-based surveillance, nationwide implementation | Governance, Program management, Workforce capacity, Data management and use                            | <input type="checkbox"/> Enabling factor<br><input type="checkbox"/> Effectiveness                       |
| World Health Organization, Western Pacific Regional Office. (2019) <sup>63</sup> | Gray      | Western Pacific Region, multiple income levels | Case-based, aggregate surveillance, nationwide implementation              | Field Logistics and communication, Data management and use                                             | <input checked="" type="checkbox"/> Enabling factor<br><input type="checkbox"/> Effectiveness            |
| World Health Organization, Western Pacific Regional Office. (2019) <sup>64</sup> | Gray      | Western Pacific Region, multiple income levels | Case-based, aggregate surveillance, nationwide implementation              | Field Logistics and communication, Laboratory                                                          | <input checked="" type="checkbox"/> Enabling factor<br><input type="checkbox"/> Effectiveness            |
| World Health Organization, Western Pacific Regional Office. (2019) <sup>65</sup> | Gray      | Western Pacific Region, multiple income levels | Case-based, aggregate surveillance, nationwide implementation              | Workforce capacity, Field logistics and communication, Laboratory                                      | <input type="checkbox"/> Enabling factor<br><input type="checkbox"/> Effectiveness                       |
| World Health Organization, Western Pacific Regional Office. (2019) <sup>66</sup> | Gray      | Western Pacific Region, multiple income levels | Case-based, aggregate surveillance, nationwide implementation              | Governance, Field Logistics and communication, Laboratory, Data management and use                     | <input checked="" type="checkbox"/> Enabling factor<br><input checked="" type="checkbox"/> Effectiveness |



**Supplement to:** Donadel M, Scobie HM, Pastore R, et al. Comprehensive vaccine-preventable disease surveillance in the Western Pacific Region: a literature review on integration of surveillance functions, 2000–2021. *Glob Health Sci Pract.* 2022;10(5):e2200017. <https://doi.org/10.9745/GHSP-D-22-00017>

|                                                                                  |      |                                                                                                                                                                                                                       |                                                    |                                                            |                                                                                               |
|----------------------------------------------------------------------------------|------|-----------------------------------------------------------------------------------------------------------------------------------------------------------------------------------------------------------------------|----------------------------------------------------|------------------------------------------------------------|-----------------------------------------------------------------------------------------------|
| World Health Organization, Western Pacific Regional Office. (2013) <sup>67</sup> | Gray | Australia, Brunei Darussalam, Cambodia, China, Fiji, Hong Kong, Japan, Lao PDR, Malaysia, Mongolia, New Zealand, PNG, Philippines, Republic of Korea, Singapore, Vietnam, multiple income levels                      | Case-based surveillance, nationwide implementation | Laboratory                                                 | <input type="checkbox"/> Enabling factor<br><input checked="" type="checkbox"/> Effectiveness |
| World Health Organization, Western Pacific Regional Office. (2019) <sup>68</sup> | Gray | Australia, Brunei Darussalam, Hong Kong, Macao, Japan, Malaysia, New Zealand, Philippines, PNG, South Korea, Singapore, Pacific Island Countries, Vietnam, Lao PDR, Mongolia, China, Cambodia, multiple income levels | Case-based surveillance, nationwide implementation | Field Logistics and communication, Data management and use | <input type="checkbox"/> Enabling factor<br><input type="checkbox"/> Effectiveness            |
| World Health Organization, Western Pacific Regional Office. (2019) <sup>69</sup> | Gray | Cambodia, Lao PDR, Mongolia, Vietnam, Fiji, Philippines, Cambodia, Macao, Hong Kong, Australia, PNG, Japan,                                                                                                           | Case-based surveillance, nationwide implementation | Data management and use                                    | <input type="checkbox"/> Enabling factor<br><input type="checkbox"/> Effectiveness            |

**Supplement to:** Donadel M, Scobie HM, Pastore R, et al. Comprehensive vaccine-preventable disease surveillance in the Western Pacific Region: a literature review on integration of surveillance functions, 2000–2021. *Glob Health Sci Pract.* 2022;10(5):e2200017. <https://doi.org/10.9745/GHSP-D-22-00017>

|                                                                                  |           |                                                                                             |                                                    |                                                                                                                  |                                                                                               |
|----------------------------------------------------------------------------------|-----------|---------------------------------------------------------------------------------------------|----------------------------------------------------|------------------------------------------------------------------------------------------------------------------|-----------------------------------------------------------------------------------------------|
|                                                                                  |           | multiple income levels                                                                      |                                                    |                                                                                                                  |                                                                                               |
| World Health Organization, Western Pacific Regional Office. (2015) <sup>70</sup> | Gray      | China, Mongolia, Vietnam, Philippines, Fiji, Cambodia, Lao PDR, PNG, multiple income levels | Case-based surveillance, nationwide implementation | Governance, Field Logistics and communication                                                                    | <input checked="" type="checkbox"/> Enabling factor<br><input type="checkbox"/> Effectiveness |
| World Health Organization, Western Pacific Regional Office. (2011) <sup>71</sup> | Gray      | Mongolia, PNG, Philippines, Vietnam, multiple income levels                                 | Case-based surveillance, nationwide implementation | Governance, Program management, Field Logistics and communication, Laboratory, Data management and use           | <input checked="" type="checkbox"/> Enabling factor<br><input type="checkbox"/> Effectiveness |
| World Health Organization, Western Pacific Regional Office. (2018) <sup>72</sup> | Gray      | Western Pacific Region, multiple income levels                                              | Case-based surveillance, nationwide implementation | Program management, Workforce capacity, Field Logistics and communication, Data management and use, Coordination | <input type="checkbox"/> Enabling factor<br><input type="checkbox"/> Effectiveness            |
| World Health Organization, Western Pacific Regional Office. (2019) <sup>73</sup> | Gray      | Western Pacific Region, multiple income levels                                              | Case-based surveillance, nationwide implementation | Laboratory                                                                                                       | <input checked="" type="checkbox"/> Enabling factor<br><input type="checkbox"/> Effectiveness |
| White et al. (2017) <sup>74</sup>                                                | Published | Samoa, UMIC                                                                                 | Case-based surveillance, nationwide implementation | Workforce capacity, Field logistics and communication, Laboratory, Data management and use                       | <input type="checkbox"/> Enabling factor<br><input type="checkbox"/> Effectiveness            |
| Chua et al. (2015) <sup>75</sup>                                                 | Published | Singapore, HIC                                                                              | Case-based surveillance, nationwide implementation | Workforce capacity, Laboratory, Data management and use                                                          | <input type="checkbox"/> Enabling factor<br><input checked="" type="checkbox"/> Effectiveness |

**Supplement to:** Donadel M, Scobie HM, Pastore R, et al. Comprehensive vaccine-preventable disease surveillance in the Western Pacific Region: a literature review on integration of surveillance functions, 2000–2021. *Glob Health Sci Pract.* 2022;10(5):e2200017. <https://doi.org/10.9745/GHSP-D-22-00017>

|                                                                                                                                                                      |           |                     |                                                                 |                                                                                            |                                                                                                          |
|----------------------------------------------------------------------------------------------------------------------------------------------------------------------|-----------|---------------------|-----------------------------------------------------------------|--------------------------------------------------------------------------------------------|----------------------------------------------------------------------------------------------------------|
| Lau et al. (2018) <sup>76</sup>                                                                                                                                      | Published | Singapore, HIC      | Case-based surveillance, single-site implementation             | Workforce capacity, Laboratory                                                             | <input type="checkbox"/> Enabling factor<br><input type="checkbox"/> Effectiveness                       |
| Jian et al. (2017) <sup>77</sup>                                                                                                                                     | Published | Chinese Taipei, HIC | Case-based, event-based surveillance, nationwide implementation | Governance, Workforce capacity, Data management and use                                    | <input type="checkbox"/> Enabling factor<br><input type="checkbox"/> Effectiveness                       |
| Nelesone et al. (2006) <sup>78</sup>                                                                                                                                 | Published | Tuvalu, UMIC        | Case-based surveillance, nationwide implementation              | Governance, Workforce capacity, Field logistics and communication, Data management and use | <input type="checkbox"/> Enabling factor<br><input checked="" type="checkbox"/> Effectiveness            |
| Alroy et al. (2018) <sup>79</sup>                                                                                                                                    | Published | Vietnam, LMIC       | Case-based surveillance, national implementation                | Governance, Workforce capacity, Laboratory, Data management and use                        | <input checked="" type="checkbox"/> Enabling factor<br><input checked="" type="checkbox"/> Effectiveness |
| Vietnam National Institute of Hygiene and Epidemiology, World Health Organization, UNICEF, and U.S. Centers for Disease Control and Prevention. (2017) <sup>80</sup> | Gray      | Vietnam, LMIC       | Case-based surveillance, nationwide implementation              | Governance, Workforce capacity, Supervision, Coordination                                  | <input type="checkbox"/> Enabling factor<br><input type="checkbox"/> Effectiveness                       |
| World Health Organization, Western Pacific Regional Office. (2019) <sup>81</sup>                                                                                     | Published | Vietnam, LMIC       | Case-based surveillance, nationwide implementation              | Workforce capacity, Data management and use                                                | <input checked="" type="checkbox"/> Enabling factor<br><input checked="" type="checkbox"/> Effectiveness |
| World Health Organization, Western Pacific Regional Office. (2015) <sup>82</sup>                                                                                     | Gray      | Vietnam, LMIC       | Case-based surveillance, nationwide implementation              | Field logistics and communication, Laboratory                                              | <input type="checkbox"/> Enabling factor<br><input type="checkbox"/> Effectiveness                       |
| Taniguchi et al. (2007) <sup>83</sup>                                                                                                                                | Published | Japan, HIC          | Case-based surveillance,                                        | Governance, Workforce capacity, Field                                                      | <input type="checkbox"/> Enabling factor<br><input type="checkbox"/> Effectiveness                       |

**Supplement to:** Donadel M, Scobie HM, Pastore R, et al. Comprehensive vaccine-preventable disease surveillance in the Western Pacific Region: a literature review on integration of surveillance functions, 2000–2021. *Glob Health Sci Pract.* 2022;10(5):e2200017. <https://doi.org/10.9745/GHSP-D-22-00017>

|                                               |           |                                                               | nationwide implementation                          | logistics and communication                                                                                                              |                                                                                                          |
|-----------------------------------------------|-----------|---------------------------------------------------------------|----------------------------------------------------|------------------------------------------------------------------------------------------------------------------------------------------|----------------------------------------------------------------------------------------------------------|
| Hyde et al. (2013) <sup>84</sup>              | Published | Global, multiple income - levels                              | Case-based surveillance, nationwide implementation | Governance                                                                                                                               | <input checked="" type="checkbox"/> Enabling factor<br><input checked="" type="checkbox"/> Effectiveness |
| Phalkey et al. (2017) <sup>85</sup>           | Published | Philippines, Vietnam, Malaysia, China, multiple income levels | Case-based surveillance, nationwide implementation | Governance                                                                                                                               | <input type="checkbox"/> Enabling factor<br><input type="checkbox"/> Effectiveness                       |
| Shu et al. (2019) <sup>86</sup>               | Published | China, UMIC                                                   | Case-based surveillance, nationwide implementation | Governance, Program management, Workforce capacity, Field logistics and communication, Laboratory, Data management and use, Coordination | <input checked="" type="checkbox"/> Enabling factor<br><input type="checkbox"/> Effectiveness            |
| Anh et al. (2020) <sup>87</sup>               | Published | Vietnam, LMIC                                                 | Aggregate surveillance, nationwide implementation  | Governance, Laboratory                                                                                                                   | <input checked="" type="checkbox"/> Enabling factor<br><input type="checkbox"/> Effectiveness            |
| Hsieh et al. (2020) <sup>88</sup>             | Published | Chinese Taipei, HIC                                           | Case-based surveillance, nationwide implementation | Laboratory                                                                                                                               | <input type="checkbox"/> Enabling factor<br><input type="checkbox"/> Effectiveness                       |
| Ma et al (2019) <sup>89</sup>                 | Published | China, UMIC                                                   | Case-based surveillance, nationwide implementation | Data management and use                                                                                                                  | <input type="checkbox"/> Enabling factor<br><input type="checkbox"/> Effectiveness                       |
| El Guerche-Séblain et al (2021) <sup>90</sup> | Published | Australia, China, Malaysia, multiple income levels            | Case-based surveillance, nationwide implementation | Governance, Workforce capacity, Field logistics and communication, Laboratory, Data management and use, Coordination                     | <input type="checkbox"/> Enabling factor<br><input type="checkbox"/> Effectiveness                       |
| Qin et al (2010) <sup>91</sup>                | Published | China, UMIC                                                   | Case-based surveillance, single facility           | Laboratory                                                                                                                               | <input type="checkbox"/> Enabling factor<br><input type="checkbox"/> Effectiveness                       |
| Manalili et al (2020) <sup>92</sup>           | Published | Philippines, LMIC                                             | Case-based surveillance,                           | Governance, Workforce                                                                                                                    | <input type="checkbox"/> Enabling factor                                                                 |

**Supplement to:** Donadel M, Scobie HM, Pastore R, et al. Comprehensive vaccine-preventable disease surveillance in the Western Pacific Region: a literature review on integration of surveillance functions, 2000–2021. *Glob Health Sci Pract.* 2022;10(5):e2200017. <https://doi.org/10.9745/GHSP-D-22-00017>

|                                           |           |                                                                                                                                                |                                                    |                                                                                                                      |                                                                                    |
|-------------------------------------------|-----------|------------------------------------------------------------------------------------------------------------------------------------------------|----------------------------------------------------|----------------------------------------------------------------------------------------------------------------------|------------------------------------------------------------------------------------|
|                                           |           |                                                                                                                                                | nationwide implementation                          | capacity, Field logistics and communication, Laboratory, Data management and use                                     | <input type="checkbox"/> Effectiveness                                             |
| Aye et al (2020) <sup>93</sup>            | Published | Malaysia, Cambodia, South Korea, Australia, New Zealand, Japan, China, Philippines, Singapore, Vietnam, Chinese Taipei, multiple income levels | Case-based surveillance, nationwide implementation | Governance, Program management, Workforce capacity, Laboratory                                                       | <input type="checkbox"/> Enabling factor<br><input type="checkbox"/> Effectiveness |
| Quinn et al (2021) <sup>94</sup>          | Published | China, Fiji, Chinese Taipei, multiple income levels                                                                                            | Case-based surveillance, nationwide implementation | Field logistics and communication                                                                                    | <input type="checkbox"/> Enabling factor<br><input type="checkbox"/> Effectiveness |
| Gonzalez-Silva et al (2021) <sup>95</sup> | Published | Global, multiple income levels                                                                                                                 | Case-based surveillance, nationwide implementation | Governance, Workforce capacity, Field logistics and communication, Laboratory, Data management and use, Coordination | <input type="checkbox"/> Enabling factor<br><input type="checkbox"/> Effectiveness |
| Chan et al (2021) <sup>96</sup>           | Published | Cambodia, Laos, Vietnam, LMIC                                                                                                                  | Case-based surveillance, nationwide implementation | Laboratory                                                                                                           | <input type="checkbox"/> Enabling factor<br><input type="checkbox"/> Effectiveness |

Definitions: LIC, Low Income Country; LMIC, Lower-Middle Income Country; UMIC, Upper-Middle Income Country; HIC, High Income Country; PNG: Papua New Guinea; US-CDC: U.S. Centers for Disease Control and Prevention; WHO: World Health Organization; WPRO: Western Pacific Regional Office
